# Supplementary material for: Binary Polyamide-Imide Fibrous Superelastic Aerogels for Fire-Retardant and High-Temperature Air Filtration
Source: MDPI journal article supplement (doi:10.3390/polym14224933), 2022-11-15
Supplement: s1 [file s1]

---

**Supplementary Material for**

**Binary Polyamide-Imide Fibrous Superelastic  
Aerogels for Fire-Retardant and High-  
Temperature Air Filtration**

Yuezhen Hua <sup>1</sup>, Wang Cui <sup>1</sup>, Zekai Ji <sup>2</sup>, Xin Wang <sup>1</sup>, Zheng Wu <sup>1</sup>, Yong Liu <sup>1</sup> and Yuyao Li <sup>1,\*</sup>

<sup>1</sup> School of Textile Science and Engineering, Tiangong University,  
Tianjin 300387, China

<sup>2</sup> Nantong Bolian Material Technology Co., Ltd., Nantong 226010, China

\* Correspondence: liyuyao@tiangong.edu.cn

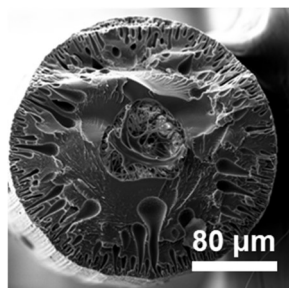

Figure S1. SEM images of cross-section of PAI/PBMI filament.

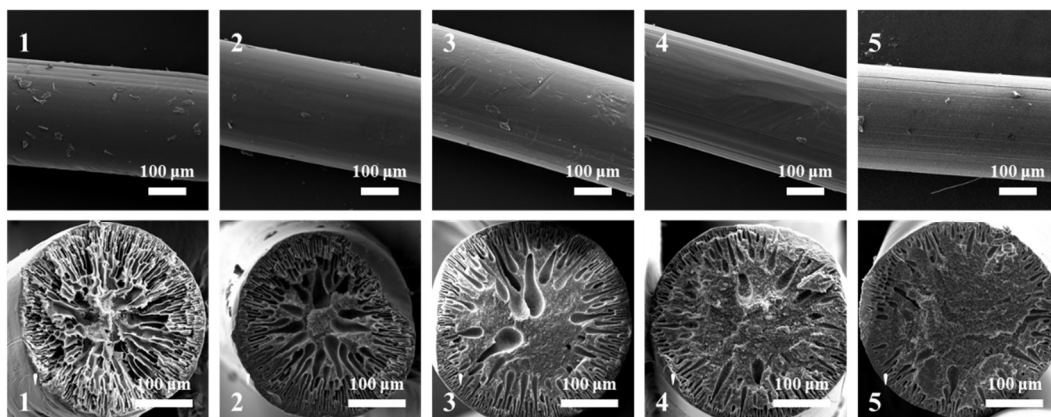

Figure S2. SEM images of different PAI content. (From left to right, the content of PAI is 15-35%)

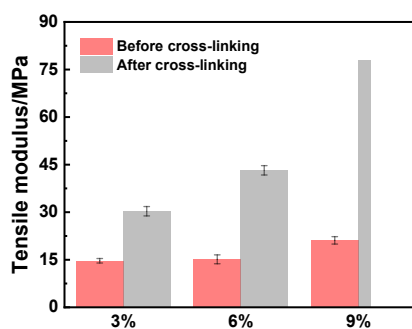

Figure S3. Tensile modulus of PAI/BMI filament before and after crosslinking.

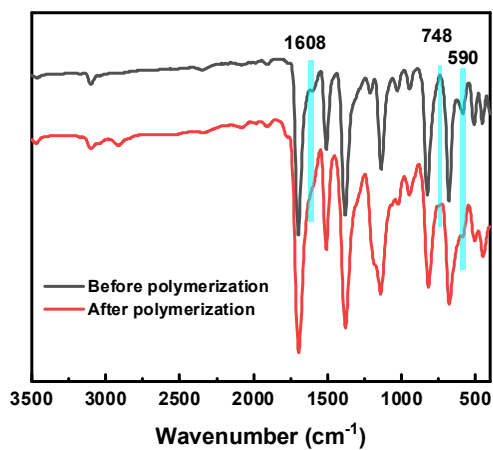

Figure S4. FTIR spectra of BMI powder before and after heating polymerization.

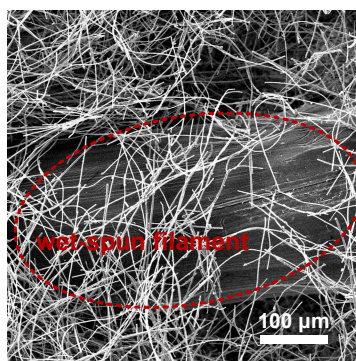

Figure S5. SEM image of dual-scale PAI/PBMI aerogel.

Table S1. The prepared different spinning solutions of wet spinning PAI/BMI filaments

| Polymer | Manufacturer and molecular weight | Mass of polymer(g) | Solute weight (DMF)(g) | BMI weight(g) |
|---------|-----------------------------------|--------------------|------------------------|---------------|
| PAI     | MW=20000,<br>Solvay.              | 1.5                | 8.5                    | 0             |
| PAI     |                                   | 2.0                | 8                      | 0             |
| PAI     |                                   | 2.5                | 7.5                    | 0             |
| PAI     |                                   | 3.0                | 7                      | 0             |
| PAI     |                                   | 3.5                | 6.5                    | 0             |
| PAI     |                                   | 3.0                | 6.7                    | 0.3           |
| PAI     |                                   | 3.0                | 6.4                    | 0.6           |
| PAI     |                                   | 3.0                | 6.1                    | 0.9           |

## Supplementary Video

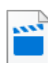

Compression  
performance dem

The compression recovery property of dual-scale PAI/PBMI fibrous aerogels.

## Supplementary Methods

### S1. Tensile test of filaments

The tensile properties of the filament were tested by YG005E electronic single yarn strength tester. The filament was held at the two ends of the chuck with 20 mm spacing and drawn at a constant speed of  $10 \text{ mm min}^{-1}$  until the filament broke. Measure the diameter of the filament using a Vernier scale before testing. Take at least 10 sets of valid data for each sample.

### S2. Aerogels compression performance test

---

The compression performance of aerogel was measured by Keithley 2400 Flexible Material Tester. The compression distance was set according to the height of the sample and the speed was  $50 \text{ mm min}^{-1}$ . The compression cycle was 1000 times, at least five sets of valid data are retained for each sample

### **S3. Filtration process**

The neutral sodium chloride (NaCl) monodisperse aerosol particles produced from atomizing air pump passed through the test samples with a valid test area of  $100 \text{ cm}^2$ . The NaCl aerosol particles, featured with a wide range of size from  $0.1$  to  $10 \text{ }\mu\text{m}$ , were detected in the upstream and downstream of the tested sample with the quantity of  $c_1$  and  $c_2$ , respectively under the ambient temperature of  $(25 \pm 2^\circ\text{C})$  and RH of  $(45 \pm 5\%)$ . The resulted filtration efficiency could be calculated via  $\eta = 1 - c_1/c_2$ . The pressure drop was resulted from the D-value of upstream and downstream measured by flow gauges.
